# Supplementary material for: Proteomic changes in intracranial blood during human ischemic stroke
Source: PubMed Central journal article supplement — J Neurointerv Surg. 2020 Jul 8;13(4):395–9. doi: 10.1136/neurintsurg-2020-016118 (PMC7982920; doi:10.1136/neurintsurg-2020-016118), 2020-07-08
Supplement: neurintsurg-2020-016118supp001.pdf [file neurintsurg-2020-016118supp001.pdf]

**Supplemental Table 1** includes all 95 proteins with significant changes in NPX between intracranial and systemic blood samples.

| Protein   | NPX Difference | Power    | P value  |
|-----------|----------------|----------|----------|
| CCL19     | -0.5111        | 0.671288 | 8.02E-05 |
| CCL20     | -0.4034        | 0.749127 | 8.28E-05 |
| FAP       | -0.2604        | 0.780347 | 9.66E-05 |
| FGF_21    | -0.3687        | 0.74329  | 0.000181 |
| TGF_alpha | -0.2839        | 0.742149 | 0.000231 |
| CCL23     | -0.4255        | 0.730538 | 0.000311 |
| PLTP      | -0.2647        | 0.701356 | 0.000476 |
| FGF_19    | -0.298         | 0.695851 | 0.000562 |
| PD_L1     | -0.2695        | 0.66698  | 0.0008   |
| CCL4      | -0.2646        | 0.672148 | 0.00086  |
| CST5      | -0.2505        | 0.683415 | 0.000868 |
| LIF_R     | -0.2449        | 0.67585  | 0.001011 |
| IL_12B    | -0.2476        | 0.680579 | 0.001059 |
| TRANCE    | -0.2765        | 0.681783 | 0.001136 |
| uPA       | -0.2452        | 0.682649 | 0.001213 |
| FGF_23    | -0.2431        | 0.689158 | 0.001234 |
| IL10      | -0.3127        | 0.688083 | 0.001323 |
| Flt3L     | -0.2513        | 0.692102 | 0.001361 |
| TNFRSF9   | -0.2588        | 0.687843 | 0.001492 |
| CCL3      | -0.2609        | 0.693592 | 0.001509 |
| MMP_10    | -0.2737        | 0.696478 | 0.001551 |
| CX3CL1    | -0.2733        | 0.681586 | 0.001829 |
| CDCP1     | -0.2395        | 0.687264 | 0.00184  |
| CD8A      | -0.2921        | 0.687534 | 0.001921 |
| DNER      | -0.236         | 0.691204 | 0.001942 |
| UMOD      | -0.1437        | 0.695634 | 0.001995 |
| IL_18R1   | -0.2311        | 0.69847  | 0.001997 |
| IL_10RA   | -0.1715        | 0.700101 | 0.002053 |
| CD5       | -0.2032        | 0.699402 | 0.002139 |
| OPG       | -0.2258        | 0.703311 | 0.002151 |
| FETUB     | -0.3136        | 0.70154  | 0.00229  |
| CXCL10    | -0.3357        | 0.700774 | 0.002355 |
| MCP_2     | -0.2238        | 0.695194 | 0.002533 |
| TNF       | -0.1995        | 0.694588 | 0.002639 |
| Beta_NGF  | -0.0701        | 0.698955 | 0.002642 |
| TRAIL     | -0.1969        | 0.701268 | 0.002657 |
| SCF       | -0.2225        | 0.694523 | 0.002882 |
| IL_15RA   | -0.1222        | 0.688396 | 0.003114 |
| CCL25     | -0.2413        | 0.679224 | 0.003426 |

|           |         |          |          |
|-----------|---------|----------|----------|
| NT_3      | -0.2107 | 0.67562  | 0.003609 |
| IL_10RB   | -0.2213 | 0.678989 | 0.00361  |
| IL18      | -0.2339 | 0.675621 | 0.003805 |
| CD244     | -0.2243 | 0.665014 | 0.00421  |
| VEGFA     | -0.2572 | 0.66502  | 0.004314 |
| CSF_1     | -0.1609 | 0.667407 | 0.004344 |
| FCN2      | -0.4628 | 0.667732 | 0.004478 |
| CXCL5     | -0.7126 | 0.63756  | 0.005606 |
| CHL1      | -0.2223 | 0.633644 | 0.005933 |
| TNFB      | -0.1709 | 0.633415 | 0.00601  |
| SERPINA7  | -0.2654 | 0.631315 | 0.006299 |
| SPARCL1   | -0.222  | 0.63389  | 0.006329 |
| APOM      | -0.2519 | 0.623421 | 0.006921 |
| VCAM1     | -0.2262 | 0.618804 | 0.007271 |
| MET       | -0.2004 | 0.613901 | 0.007666 |
| CD6       | -0.2761 | 0.593737 | 0.008852 |
| IL_17A    | -0.1608 | 0.596081 | 0.008897 |
| PRSS2     | -0.2208 | 0.598318 | 0.008961 |
| IL7       | -0.222  | 0.594624 | 0.009305 |
| IGLC2     | -0.2312 | 0.595015 | 0.009502 |
| NCAM1     | -0.2409 | 0.593428 | 0.009763 |
| ICAM1     | -0.2438 | 0.588071 | 0.010251 |
| DPP4      | -0.2287 | 0.590943 | 0.010268 |
| LYVE1     | -0.2147 | 0.587708 | 0.010636 |
| THBS4     | -0.2212 | 0.587314 | 0.010833 |
| LILRB5    | -0.2182 | 0.589758 | 0.01085  |
| SELL      | -0.2372 | 0.582219 | 0.011562 |
| PTPRS     | -0.1864 | 0.584138 | 0.011602 |
| COMP      | -0.2328 | 0.58535  | 0.011674 |
| IFN_gamma | -0.2109 | 0.58397  | 0.011887 |
| CRTAC1    | -0.2708 | 0.583692 | 0.01215  |
| REG1A     | -0.2223 | 0.579729 | 0.012657 |
| AOC3      | -0.1892 | 0.570553 | 0.013592 |
| TIE1      | -0.1618 | 0.569845 | 0.013839 |
| IGFBP6    | -0.2298 | 0.567164 | 0.014252 |
| KIT       | -0.1961 | 0.567648 | 0.014433 |
| TIMD4     | -0.2096 | 0.561527 | 0.015167 |
| GDNF      | -0.198  | 0.549413 | 0.016484 |
| CR2       | -0.2169 | 0.547338 | 0.016957 |
| CD40      | -0.1837 | 0.548281 | 0.017017 |
| CXCL9     | -0.1806 | 0.539908 | 0.018168 |
| NRP1      | -0.1364 | 0.54199  | 0.018229 |
| PROC      | -0.2495 | 0.541046 | 0.018556 |

|        |         |          |          |
|--------|---------|----------|----------|
| IGFBP3 | -0.2258 | 0.529294 | 0.020118 |
| C2     | -0.2108 | 0.529719 | 0.020284 |
| TGFBI  | -0.2493 | 0.529786 | 0.020521 |
| F11    | -0.1954 | 0.532088 | 0.020537 |
| TWEAK  | -0.1928 | 0.532062 | 0.020663 |
| ENG    | -0.1813 | 0.51866  | 0.022717 |
| VASN   | -0.1632 | 0.519576 | 0.022846 |
| CST3   | -0.2561 | 0.51746  | 0.023379 |
| HGF    | -0.2178 | 0.517844 | 0.023509 |
| MBL2   | -0.2092 | 0.520072 | 0.023545 |
| IL_2RB | -0.1373 | 0.521335 | 0.023572 |
| OSMR   | -0.1258 | 0.523325 | 0.023607 |
| TNC    | -0.1772 | 0.520719 | 0.02419  |
